1

2

3

4 **Expression and protein sequence analyses of zebrafish**  
5 ***imp2a* and *imp2b*, two proteoglycans of the**  
6 **interphotoreceptor matrix**

7

8

9 **IMP2 expression in zebrafish developing and adult retina and protein**  
10 **structure analysis by homology modeling**

11

12

13

14 M.E. Castellini<sup>1</sup>, G. Spagnolli<sup>1</sup>, E. Biasini<sup>1</sup>, S. Casarosa<sup>1,¶,\*</sup>, A. Messina<sup>1,#,¶</sup>

15

16

17

18 <sup>1</sup> Department of Cellular, Computational and Integrative Biology (CIBIO), University of Trento,  
19 Trento, Italy

20 <sup>#</sup> Current address: Center for Mind/Brain Sciences (CIMEC), University of Trento, Trento, Italy

21

22

23 \* Corresponding author

24 E-mail: [simona.casarsa@unitn.it](mailto:simona.casarsa@unitn.it) (SC)

25

26 † Both authors contributed equally

27

## 28 **Abstract**

29 Photoreceptor outer segments projecting from the surface of the neural retina toward the retinal  
30 pigment epithelium (RPE) are surrounded by a carbohydrate-rich matrix, the interphotoreceptor  
31 matrix (IPM) [1,2]. This extracellular compartment is necessary for physiological retinal function.  
32 However, specific roles for molecules characterizing the IPM have not been clearly defined [3].  
33 Recent studies have found the presence of nonsense mutations in the interphotoreceptor matrix  
34 proteoglycan 2 (*IMPG2*) gene in patients affected by autosomal recessive Retinitis Pigmentosa  
35 (arRP) [4,5] and autosomal dominant and recessive vitelliform macular dystrophy (VMD) [6,7]. The  
36 gene encodes for a proteoglycan synthesized by photoreceptors and secreted in the IPM. However,  
37 little is known about the function and structure of this protein. We used the teleost zebrafish (*D. rerio*)  
38 as a model to study *IMPG2* expression both during development and in adulthood, as its retina is  
39 very similar in humans [8]. In zebrafish, there are two *IMPG2* proteins, *IMPG2a* and *IMPG2b*. We  
40 generated a phylogenetic tree based on *IMPG2* protein sequence similarity among different  
41 vertebrate species, showing a significant similarity despite the evolutionary distance between  
42 humans and teleosts. In fact, human *IMPG2* and *D. rerio* *IMPG2a* and *IMPG2b* share conserved SEA  
43 and EGF-like domains. Homology models of these domains were obtained by using the iTasser  
44 server. Finally, expression analyses of *imp2a* and *imp2b* during development and in the adult fish  
45 showed expression of both mRNAs starting from 3 days post fertilization (dpf) in the outer nuclear  
46 layer of zebrafish retina that continues throughout adulthood. This data lays the groundwork for the  
47 generation of novel and most needed animal models for the study of *IMPG2*-related inherited retinal  
48 dystrophies.

49

## 50 Introduction

51 The IPM is the extracellular matrix, mainly composed of proteoglycans and  
52 glycosaminoglycans, surrounding retinal photoreceptor outer segments and ellipsoids [9].  
53 The function of the IPM in retinal function has started to be investigated only recently, as is  
54 its involvement in retinal disorders [10]. In the last years, new roles for the IPM were  
55 identified, which include intercellular communication, membrane and matrix turnover,  
56 regulation of neovascularization, cell survival, photoreceptor differentiation and  
57 maintenance, retinoid transport [3,5,11-13]. Moreover, mutations in proteins localized to the  
58 IPM such as IRBP have been shown to be involved in inherited retinal dystrophies (IRDs)  
59 [14-17]. Recent studies have reported that mutations in the *IMPG2* gene are associated with  
60 arRP [4,5] and autosomal dominant and recessive VMD [6,7] in humans. Retinitis  
61 pigmentosa (RP [MIM 268000]) is the most common IRD [18-20] involving progressive  
62 degeneration of photoreceptor cells and RPE [21,22]. Vitelliform macular dystrophy (VMD  
63 [MIM 153700]), also called Best disease, is an early-onset disorder characterized by  
64 accumulation of lipofuscin-like material within and beneath the retinal pigment epithelium  
65 together with a progressive loss of central vision [23,24]. The *IMPG2* gene encodes for the  
66 proteoglycan IMPG2, synthesized by both rods and cones and secreted in the IPM [1,2,25,  
67 26]. Recent studies have shown progressive cone cell degeneration, increased levels of  
68 endoplasmic reticulum (ER) stress-related proteins and abnormal accumulation of the  
69 interphotoreceptor proteoglycan 1 (IMPG1) at the subretinal space, leading to reduced  
70 visual function, in *IMPG2* knockout (KO) mouse models [27,28]. The function of IMPG2 in  
71 retinal development and function, however, has not been clearly established yet. In this  
72 study, we investigated *IMPG2* expression and protein structure in the teleost zebrafish  
73 (*Danio rerio*), since it has a cone-dominant vision and thus, its retinal anatomy is quite similar  
74 to humans [8,29-31]. However, during evolution, the genome of teleost fishes underwent

75 duplication. For this reason, many genes are found in two copies, named paralogues [32].  
76 *IMPG2* is present as *imp2a* and *imp2b*. We obtained a phylogenetic tree of *IMPG2* in  
77 different vertebrate species to investigate the extent of protein conservation during evolution.  
78 Moreover, since *IMPG2* protein structure has largely been unstudied, we performed  
79 homology modelling of *IMPG2* conserved domains both in human and in zebrafish. Finally,  
80 we analysed for the first time the expression of *imp2a* and *imp2b* in zebrafish, during early  
81 development and in the adult.

82

## 83 **Results**

84

### 85 ***IMPG2* sequence conservation analysis among vertebrates**

86 Human *IMPG2* is a 1241 residues protein with four topologically distinct regions: a signal  
87 peptide of 22 amino acids at the N-terminus, an extracellular topological domain (residues  
88 23 to 1099), a helical transmembrane domain (residues 1100 to 1120) and a cytoplasmic  
89 topological domain (residues 1121 to 1241). It also contains two SEA domains and two EGF-  
90 like tandem repeats, together with 5 hyaluronan-binding motifs. The protein is also a target  
91 for post-translational modifications, such as glycosylation and phosphorylation, at different  
92 sites (UniProt database).

93 We first investigated *IMPG2* conservation during evolution, by alignment of the protein  
94 sequence of each chosen species and subsequent generation of a phylogenetic tree. *IMPG2*  
95 protein sequences of different species were retrieved from NCBI database, which indicated  
96 the presence of *IMPG2* only in jawed vertebrates. We selected some of the most common  
97 species of different vertebrate groups to include in our analysis. We then used the Clustal  
98 Omega sequence alignment program to perform a multiple sequence alignment and  
99 generate a phylogenetic tree (Fig 1a), which reflects the distance in terms of sequence

100 alignment between the different vertebrate species. The length of the branches is directly  
101 correlated with the difference between the sequences. For example, we observed that *Danio*  
102 *rerio* IMPG2a and IMPG2b and *Homo sapiens* IMPG2 protein sequences cluster separately.  
103 Such a sequence difference reflects the evolutionary distance between the two groups.  
104 Moreover, as reported in Section 1, the genome of teleost fishes underwent duplication [32],  
105 explaining the presence of two paralogues in *Danio rerio*, which cluster together in the  
106 phylogenetic tree (Fig 1a). Interestingly, the other teleost fishes included in our analysis  
107 (*Notobranchius furzeri* and *Oryzias latipes*) do not have paralogues. One explanation could  
108 be that the genomes of these two species underwent duplication, but the second copy of  
109 the gene lost its function during evolution and was no longer subjected to selective pressure.  
110 To understand in more detail the sequence conservation between the two zebrafish proteins  
111 and human IMPG2 we used UniProt database and we found some domains (SEA, EGF-like  
112 and transmembrane) that are conserved in all the three proteins (Fig 1b). By using the  
113 BLAST Alignment Tool, we demonstrated that both fish proteins share 65% identity with the  
114 region of the human protein where the conserved domains are located (residues 879-1238).  
115 These conserved domains were then deeper analysed by homology modelling, as described  
116 in the subsequent section.

117

118 **Fig 1: IMPG2 protein sequence conservation among vertebrates.** (A) Protein sequence  
119 phylogenetic tree of IMPG2 among different vertebrate species obtained with the EMBL-EBI  
120 sequence analysis tool. Length of the branches reflects the distance between sequences. (B)  
121 Comparison of human IMPG2 protein and zebrafish IMPG2a and IMPG2b proteins. UniProt  
122 database was used to highlight the conserved domains in each of three proteins. In red, signal  
123 peptide; in light blue, SEA domain; in green, EGF-like domain; in yellow, transmembrane domain.

124

## 125 **Modelling of SEA and EGF-like domains in human IMPG2 and D.rerio**

### 126 **IMPG2a and IMPG2b**

127 Since little is known about the structure of the IMPG2 protein, we used iterative threading  
128 assembly refinement (iTasser) modelling to investigate the putative conformations of SEA  
129 and EGF-like conserved domains from their amino acid sequences [33]. The following  
130 sequences of the human protein were submitted to the iTasser webserver: 239-390, for  
131 SEA1, 896-1012 for SEA2 and 1012-1098 for the EGF-like tandem repeat. Domain  
132 identifications were obtained by checking Pfam [34] and Prosite [35] annotations. Then we  
133 used BLAST alignment to identify the sequences corresponding to the human domains in  
134 zebrafish IMPG2a and IMPG2b. The results are reported in Fig 2a. These sequences (also  
135 adding the non-overlapping residues at the terminals) were also submitted to the iTasser  
136 webserver for modelling. The best model proposed by iTasser for each domain was selected  
137 in terms of C-score. The predicted structures are represented in Fig 2b.

138

139 **Fig 2: IMPG2, IMPG2a and IMPG2b conserved domains.** (A) the figure shows SEA-1, SEA-2 and  
140 EGF-like domain sequences in zebrafish IMPG2a and IMPG2b with respect to the human protein.  
141 (B) Ribbon diagrams of structural models generated by iTasser of human IMPG2-SEA1, IMPG2-  
142 SEA2 and IMPG2- EGF-like-repeats, zebrafish IMPG2a-SEA1, IMPG2a-SEA2, and IMPG2a- EGF-  
143 like-repeats, zebrafish IMPG2b-SEA1, IMPG2b-SEA2 and IMPG2b-EGF-like-repeats. Secondary  
144 structures are depicted in different colours: blue,  $\alpha$ -helices; red,  $\beta$ -strands; grey, coils.

145

### 146 ***imp2a* and *imp2b* mRNA expression**

147 We investigated *imp2a* and *imp2b* mRNA expression in zebrafish during early embryonic  
148 development and in the adult fish. RT-qPCR experiments were performed on RNAs  
149 extracted from pools of whole embryos at different developmental stages and from pools of

150 organs of adult fish. Results revealed very low expression of *imp2b* at 2.5 dpf and low  
151 *imp2a* mRNA levels at 3 dpf. However, *imp2b* and *imp2a* mRNAs start being significantly  
152 expressed at 3 dpf and 4 dpf, respectively ( $p < 0.001$ , Tukey's test following one-way  
153 ANOVA). In the analysis we compared the expression of *imp2a* and *imp2b* with that of  
154 *rhodopsin*, a strongly expressed photoreceptor-specific gene (Fig 3a). In the adult fish, RT-  
155 qPCR experiments showed that *imp2a* and *imp2b* are specifically expressed in the eye  
156 (Fig 3b). We next performed *in situ* hybridization (ISH) experiments on sections of embryos  
157 at 3, 5, and 7 dpf and adult fish, to investigate the localization of *imp2a* and *imp2b* mRNAs  
158 (Fig 3c). At 3 dpf the signals detected by ISH for both mRNAs are very low, becoming  
159 however detectable at 5 dpf with a specific expression in photoreceptor cell bodies. At 7 dpf  
160 the signal in the photoreceptor layer is stronger, and this high level of expression is  
161 maintained in the adult. Moreover, *imp2a* and *imp2b* expression seems to be found in  
162 both rods and cones, as already found in humans [36].

163

164 **Fig 3: *imp2a* and *imp2b* expression during development and in the adult fish.** (A)  
165 Quantitative RT-PCR analysis of *imp2a* and *imp2b* at different developmental stages. The  
166 expression of the two genes was compared to that of *rhodopsin*; *Ube2a* was used as control [37].  
167 Data from three independent experiments revealed that *imp2a* starts to be significantly expressed  
168 at 4 dpf ( $p < 0.001$ , Tukey's test following one-way ANOVA, 2 dpf vs. 4 dpf,  $n = 20$  embryos per time  
169 point per experiment), whereas *imp2b* at 3 dpf ( $p < 0.001$ , Tukey's test following one-way ANOVA,  
170 2 dpf vs. 3 dpf,  $n = 20$  embryos per time point per experiment). (B) mRNA expression levels of *imp2a*  
171 and *imp2b*, as obtained by RT-qPCR performed on pools of adult organs for each experiment. Data  
172 from three independent experiments showed specific expression of the two genes in the eye. (C) *In*  
173 *situ* hybridization experiments showing specific expression of both *imp2a* and *imp2b* mRNAs in  
174 the photoreceptor layer (black arrows) at different developmental stages and in the adult fish. Scale  
175 bars: 100  $\mu\text{m}$ .

176

177 **IMPG2a and IMPG2b protein expression analysis during development**  
178 **and in the adult**

179 To study protein expression during development and in the adult fish, we performed western  
180 blot experiments on pools of embryos at different developmental stages and pools of brains  
181 and eyes of adult fishes. We used a human IMPG2-specific antibody that recognizes both  
182 IMPG2a and IMPG2b proteins in zebrafish. The expression of the two proteins becomes  
183 detectable by western blot at 3 dpf (Fig 4a). Rhodopsin, a protein involved in the  
184 phototransduction cascade and expressed only in the outer segment of rod photoreceptor  
185 cells [38], also starts being expressed at 3 dpf. This suggests that IMPG2 expression  
186 accompanies photoreceptor maturation. Moreover, both proteins show a retina-specific  
187 expression, as observed for their mRNAs.

188 To study the localization of IMPG2 in the zebrafish retina, we performed  
189 immunohistochemistry (IHC) experiments on sections of embryos at 5 dpf, 7 dpf and adult  
190 (Fig 4b). IMPG2 starts to be detected by IHC at 5 dpf and becomes stronger with  
191 development. It is particularly evident in the adult retina that IMPG2 localizes in the  
192 photoreceptor layer and in the interphotoreceptor matrix and it colocalizes with Rhodopsin,  
193 a rod outer segment (ROS) disk membrane specific marker [39], at the rod outer segments.

194

195 **Figure 4: IMPG2a and IMPG2b localization during development and in the adult fish.**

196 (A) Representative western blot experiment showing expression of IMPG2a and IMPG2b starting  
197 from 3 dpf in zebrafish embryos and in the eye but not in the brain of adult zebrafish. Rhodopsin was  
198 used as a control. Actinin was used as housekeeping protein. (B) Immunohistochemistry for IMPG2  
199 and Rhodopsin 1D4 performed on retina sections (14  $\mu$ m) of zebrafish at 5 and 7 dpf and adult fish.  
200 IMPG2 signal starts to be detected at 5 dpf and becomes stronger in the adult retina, where it  
201 localizes in the photoreceptor cell body, in the photoreceptor outer segment (colocalizing with



202 Rhodopsin, as indicated by the white arrow) and in the IPM. Brightfield images in the first column  
203 show the structure and the integrity of the retina and RPE. Scale bars: 50  $\mu\text{m}$ . Inserts in merged  
204 images show higher magnification (scale bars: 100  $\mu\text{m}$ ).

205

## 206 Discussion

207 The extracellular matrix of the retina plays a key role in retinal function and disease [10; 40-  
208 42]. However, little is known about the function and the structure of many of its components,  
209 such as the proteoglycan IMPG2. Our study highlights the presence of SEA and EGF-like  
210 conserved domains in IMPG2 protein sequence of evolutionary distant vertebrate species  
211 such as *H.sapiens* and *D.rerio*. Interestingly, unlike other teleosts, *D.rerio* have two  
212 paralogues, IMPG2a and IMPG2b. This is not a peculiarity of IMPG2, indeed there are other  
213 genes characterized by having two paralogues in *D.rerio* but not in other teleost species,  
214 such as *rs1a* and *rs1b*. These two genes are orthologues of the human *RS1* gene, whose  
215 mutation is associated X-linked retinoschisis (*XLR1* [MIM 312700]) in human [43].  
216 Homology models of SEA and EGF-like conserved domains in human IMPG2 and zebrafish  
217 IMPG2a and IMPG2b show structure similarity of the domains in the two species.  
218 Importantly, we report for the first time the expression pattern of the two proteins in zebrafish,  
219 a valuable model organism for the study of human ophthalmological disorders. Unlike mouse  
220 models, they have cone-dominant vision like humans and the retina anatomy is similar to  
221 that found in humans [30,31]. Our experiments show expression of *imp2a* and *imp2b*  
222 mRNAs and proteins starting from 3 dpf. Moreover, we found both mRNAs and proteins to  
223 be specifically expressed in the photoreceptor layer and in the IPM. These data are  
224 consistent with the results of previous studies regarding localization of IMPG2 in rodents  
225 [1,27]. This work combines structural analysis of the conserved domains of human IMPG2  
226 and zebrafish IMPG2a and IMPG2b, and expression analysis of *imp2a* and *imp2b* in

227 zebrafish embryos and in the adult, providing novel insights into the biology of these  
228 disease-related genes.

229

## 230 **Materials and methods**

### 231 **Animal care and maintenance**

232 AB/TU wild-type zebrafish strain was used for all experimental procedures. Zebrafish were  
233 used under the approval of the OPBA of the University of Trento on Animal Welfare and  
234 Ministero della Salute (Project Number 151/2019-PR) and were raised following standard  
235 procedures [44].

236

### 237 **Phylogenetic tree**

238 NCBI database was used to find orthologs to the human IMPG2 (*Homo sapiens* IMPG2,  
239 NP\_057331.2; Norway ray IMPG2, XP\_008766850.1; *Mus musculus* IMPG2,  
240 XP\_017172459.1; *Gallus gallus* IMPG2, XP\_015151604.1; *Xenopus tropicalis* IMPG2,  
241 XP\_012813076.1; *Danio rerio* impg2a XP\_017213311.1; *Danio rerio* impg2b  
242 XP\_021329195.1; *Notobranchius furzeri* IMPG2, XP\_015821571.1; *Oryzias latipes* IMPG2,  
243 XP\_023806900.1). After choosing the vertebrate species to be included in the phylogenetic  
244 tree, IMPG2 protein sequences of these animals were obtained from both databases and a  
245 multiple protein sequence alignment was performed by using Clustal Omega sequence  
246 alignment program, provided by EMBL-EBI (<https://www.ebi.ac.uk/Tools/msa/clustalo/>). The  
247 same sequence analysis tool was used to generate a phylogenetic tree, based on protein  
248 sequence similarity.

249

### 250 **Modelling of SEA and EGF-like domains**

251 Modelling of the SEA and EGF-Like domains was performed by using the iTasser webserver  
252 (<https://zhanglab.ccmb.med.umich.edu/I-TASSER/>). The submitted sequences for human  
253 IMPG2 were: 239-390 (SEA1), 896-1012 (SEA2) and 1012-1098 (EGF-like tandem repeat).  
254 The corresponding submitted sequences of IMPG2a were 239-371 (SEA1), 775-889 (SEA2)  
255 and 889-972 (EGF-like tandem repeat). The corresponding submitted sequences of  
256 IMPG2b were 1177-1333 (SEA1), 2473-2587 (SEA2) and 2587-2673 (EGF-like tandem  
257 repeat).

258

### 259 **RNA extraction and RT-qPCR**

260 Total RNAs from pools of 15 embryos at different developmental stages and from pools of  
261 3 adult eyes and 2 adult brains were extracted by Macherey Nagel NucleoSpin<sup>®</sup> RNA. cDNA  
262 was synthesized by Super-Script<sup>®</sup> VILO<sup>™</sup> cDNA Synthesis Kit (Invitrogen). RT-qPCR was  
263 performed using KAPA SYBR<sup>®</sup> FAST Master Mix (KAPA Biosystems) according to the  
264 manufacturer's instructions. *Ube2a* was used as housekeeping gene and *rhodopsin* was  
265 used as reference gene, since it is highly expressed in the retina. Relative expression of  
266 each mRNA with respect to *Ube2a* mRNA was calculated as the average of three  
267 independent experiments. Expression analysis was performed using the CFX3Gene  
268 Manager (BioRad) software. Gene primers are listed in S1 Table.

269

### 270 **Protein extraction and western blot**

271 Total proteins from pools of 15 embryos at different developmental stages and from pools  
272 of 3 adult eyes and 2 adult brains were extracted using RIPA buffer. 10 µg of total extract  
273 were resolved by SDS-PAGE, transferred to a nitrocellulose membrane and then incubated  
274 with the antibodies reported in S2 Table.

275

## 276 **Design of RNA probes**

277 The genome browser Ensembl was used to find the exon sequences of the genes of interest.  
278 NCBI Primer-Blast (<https://www.ncbi.nlm.nih.gov/tools/primer-blast/>) was used to design the  
279 primers, following two criteria: ideal length between 20 and 24 bp and GC content between  
280 42% and 52%. For the amplicon instead, a length between 400 and 1200 bp was chosen,  
281 with an ideal value of 600 bp. Finally, the T7 polymerase promoter sequence  
282 (GCGTAATACGACTCACTATAGGG) was added to the 5' of the designed primers (S3  
283 Table).

284

## 285 **Digoxigenin-labelled RNA probe synthesis**

286 RNA extracted from a pool of 3 adult eyes with Macherey Nagel NucleoSpin® RNA kit was  
287 reverse transcribed into cDNA, as described in section 4.4. The obtained cDNA was  
288 selectively amplified by using the primers in Table 2. PCR product was then purified using  
289 Wizard® SV Gel and PCR Clean-Up System (Promega) and used for *in vitro* transcription  
290 with digoxigenin (DIG) labelled ribonucleotides and T7 polymerase. RNA samples were then  
291 treated with DNase I (Biolabs) to eliminate the cDNA templates and precipitated by adding  
292 salts (EDTA and 4M LiCl) and ethanol.

293

## 294 **ISH on retina sections**

295 Embryos at different stages were fixed in 4% paraformaldehyde (PFA) at 4°C overnight,  
296 embedded in 30% sucrose at 4°C for 2-3 hours and included in OCT compound, with a head  
297 down position. Cryostat was used to obtain 14 µm retina sections. Briefly, sections were  
298 hybridized with 1 µg/ml probes overnight at 65 °C. The following day, saline sodium citrate  
299 (SSC) stringency washes and MABT (100mM maleic acid, 150mM NaCl, 0.1% Tween20)  
300 washes were performed. Sections were then incubated with blocking solution (1x MABT 1x,

301 2% Roche blocking reagent, 20% heat inactivated sheep serum) for 2 hours at RT and then  
302 with 1/2500 anti-DIG-AP antibody (Roche) in blocking solution overnight at 4 °C. The  
303 following day, after MABT washes, sections were coloured using NBT/BCIP (Roche).

304

## 305 **Immunohistochemistry**

306 Embryos at different stages were fixed in 4% paraformaldehyde (PFA) at 4°C overnight,  
307 embedded in 30% sucrose at 4°C for 2-3 hours and included in OCT compound, with a head  
308 down position. Cryostat was used to obtain 14 µm retina sections. Immunohistochemistry  
309 was performed as follows: slides with sections were incubated in blocking solution (0.1%  
310 Triton X-100 and 0.5% BSA in 1× PBS) for 1 hour at room temperature (RT) and then  
311 incubated in diluted primary antibody in blocking solution (dilution specific for the primary  
312 antibody in use), at 4 °C overnight in humidified chamber. After 3 washes of 10 minutes in  
313 1× PBS, 0.1% Triton X-100, slides were incubated in secondary antibody in blocking solution  
314 (1:1000), for 2 hours at RT in humidified chamber. Slides were then washed 3 times for 10  
315 minutes 1× PBS, 0.1% Triton X-100 and then incubated with nuclear staining dye (1:10000;  
316 Hoechst 1) in 1× PBS for 10 minutes at RT. Following 3 washes of 10 minutes in 1× PBS,  
317 0.1% Triton X-100, slides were mounted using Aqua-Poly/Mount coverslipping medium  
318 (Polysciences, Inc.).

319 Primary and secondary antibodies used for immunohistochemistry experiments are reported  
320 in S2 Table.

321

## 322 **Image acquisition**

323 *In situ* hybridization images were taken on a Zeiss Axio Imager M2 up-right microscope  
324 using an EC Plan-Neofluar 40x/0.7 objective (Carl Zeiss Microscopy, LLC).

325 Immunohistochemistry images were acquired using a Leica TCS SP8 confocal microscope  
326 equipped with an Andor iXon Ultra 888 monochromatic camera. The HC PL APO 40x/1.30  
327 Oil CS2 (Leica Microsystems) objective was used for the acquisition. All figures were  
328 assembled in Fiji and Photoshop.

329

## 330 **Statistical analyses**

331 All data are reported as mean  $\pm$  SEM. Statistical analysis was performed using the  
332 GraphPad Software. Data groups from RT-qPCR experiments were compared by one-way  
333 ANOVA followed by Tukey's test for multiple comparisons. Statistical significance level was  
334 set at  $p < 0.05$ . Values levels of statistical significance are described by asterisks (\* $p < 0.05$ ;  
335 \*\* $p < 0.01$ ; \*\*\* $p < 0.001$ ).

336

## 337 **Declaration of competing interest**

338 GS and EB are co-founders and shareholders of Sibylla Biotech SRL.

339

## 340 **Acknowledgments**

341 We greatly thanks Ilaria Mazzeo (Model Organism Facility, Department of CIBIO, University  
342 of Trento) and Giorgina Scarduelli (Advanced Imaging Core Facility, Department of CIBIO,  
343 University of Trento) for their help in fish care and maintenance and image acquisition,  
344 respectively.

345

## 346 **References**

- 347 1. Chen, Q., Lee, J. W., Nishiyama, K., Shadrach, K. G., Rayborn, M. E., & Hollyfield, J. G.  
348 (2003). SPACRCAN in the interphotoreceptor matrix of the mouse retina: Molecular,  
349 developmental and promoter analysis. *Experimental Eye Research*, 76(1), 1–14.
- 350 2. Chen, Q., Cai, S., Shadrach, K. G., Prestwich, G. D., & Hollyfield, J. G. (2004). Spacrcan  
351 binding to hyaluronan and other glycosaminoglycans: Molecular and biochemical studies.  
352 *Journal of Biological Chemistry*, 279(22), 23142–23150.
- 353 3. Inoue, Y., Yoneda, M., Zhao, J., Miyaishi, O., Ohno-Jinno, A., Kataoka, T., Isogai, Z., Kimata,  
354 K., Iwaki, M., & Zako, M. (2006). Molecular cloning and characterization of chick SPACRCAN.  
355 *Journal of Biological Chemistry*, 281(15), 10381–10388.
- 356 4. Bandah-Rozenfeld, D., Mizrahi-Meissonnier, L., Farhy, C., Obolensky, A., Chowers, I., Pe'Er,  
357 J., Merin, S., Ben-Yosef, T., Ashery-Padan, R., Banin, E., & Sharon, D. (2010). Homozygosity  
358 mapping reveals null mutations in FAM161A as a cause of autosomal-recessive retinitis  
359 pigmentosa. *American Journal of Human Genetics*, 87(3), 382–391.
- 360 5. van Huet, R. A. C., Collin, R. W. J., Siemiakowska, A. M., Klaver, C. C. W., Hoyng, C. B.,  
361 Simonelli, F., Khan, M. I., Qamar, R., Banin, E., Cremers, F. P. M., Theelen, T., den  
362 Hollander, A. I., van den Born, L. I., & Klevering, B. J. (2014). IMPG2-associated retinitis  
363 pigmentosa displays relatively early macular involvement. *Investigative Ophthalmology and*  
364 *Visual Science*, 55(6).
- 365 6. Meunier, I., Manes, G., Bocquet, B., Marquette, V., Baudoin, C., Puech, B., Defoort-  
366 Dhellemmes, S., Audo, I., Verdet, R., Arndt, C., Zanlonghi, X., Le Meur, G., Dhaenens, C.  
367 M., & Hamel, C. P. (2014). Frequency and clinical pattern of vitelliform macular dystrophy  
368 caused by mutations of interphotoreceptor matrix IMPG1 and IMPG2 genes. *Ophthalmology*,  
369 121(12), 2406–2414.
- 370 7. Brandl, C., Schulz, H. L., Charbel Issa, P., Birtel, J., Bergholz, R., Lange, C., Dahlke, C.,  
371 Zobor, D., Weber, B. H. F., & Stöhr, H. (2017). Mutations in the genes for interphotoreceptor  
372 matrix proteoglycans, IMPG1 and IMPG2, in patients with vitelliform macular lesions. *Genes*,  
373 8(7), 1–14.

- 374 8. Fadool, J. M., & Dowling, J. E. (2008). Zebrafish: A model system for the study of eye  
375 genetics. *Progress in Retinal and Eye Research*, 27(1), 89–110.
- 376 9. Ishikawa, M., Sawada, Y., & Yoshitomi, T. (2015). Structure and function of the  
377 interphotoreceptor matrix surrounding retinal photoreceptor cells. *Experimental Eye*  
378 *Research*, 133, 3–18.
- 379 10. Al-Ubaidi, M. R., Naash, M. I., & Conley, S. M. (2013). A perspective on the role of the  
380 extracellular matrix in progressive retinal degenerative disorders. *Investigative*  
381 *Ophthalmology & Visual Science*, 54(13), 8119–8124.
- 382 11. Hewit AT, Adler R. (1989). The retinal pigment epithelium and interphotoreceptor matrix:  
383 structure and specialized function. In: Ryan SJ, ed. *Retina*. St. Louis: CV Mosby Co.; 57–64.
- 384 12. Inatani, M., & Tanihara, H. (2002). Proteoglycans in retina. *Progress in Retinal and Eye*  
385 *Research*, 21(5), 429–447.
- 386 13. Felemban, M., Dorgau, B., Hunt, N. C., Hallam, D., Zerti, D., Bauer, R., Ding, Y., Collin, J.,  
387 Steel, D., Krasnogor, N., Al-Aama, J., Lindsay, S., Mellough, C., & Lako, M. (2018).  
388 Extracellular matrix component expression in human pluripotent stem cell-derived retinal  
389 organoids recapitulates retinogenesis in vivo and reveals an important role for IMPG1 and  
390 CD44 in the development of photoreceptors and interphotoreceptor matrix. *Acta*  
391 *Biomaterialia*, 74, 207–221.
- 392 14. den Hollander, A. I., McGee, T. L., Ziviello, C., Banfi, S., Dryja, T. P., Gonzalez-Fernandez,  
393 F., Ghosh, D., & Berson, E. L. (2009). A homozygous missense mutation in the IRBP gene  
394 (RBP3) associated with autosomal recessive retinitis pigmentosa. *Investigative*  
395 *ophthalmology & visual science*, 50(4), 1864–1872.
- 396 15. Li, S., Yang, Z., Hu, J., Gordon, W. C., Bazan, N. G., Haas, A. L., Bok, D., & Jin, M. (2013).  
397 Secretory defect and cytotoxicity: the potential disease mechanisms for the retinitis  
398 pigmentosa (RP)-associated interphotoreceptor retinoid-binding protein (IRBP). *Journal of*  
399 *Biological Chemistry*, 288(16), 11395–11406.
- 400 16. Sato, K., Li, S., Gordon, W. C., He, J., Liou, G. I., Hill, J. M., Travis, G. H., Bazan, N. G., &  
401 Jin, M. (2013). Receptor interacting protein kinase-mediated necrosis contributes to cone



- 402 and rod photoreceptor degeneration in the retina lacking interphotoreceptor retinoid-binding  
403 protein. *Journal of Neuroscience*, 33(44), 17458–17468.
- 404 17. Markand, S., Baskin, N. L., Chakraborty, R., Landis, E., Wetzstein, S. A., Donaldson, K. J.,  
405 Priyadarshani, P., Alderson, S. E., Sidhu, C. S., Boatright, J. H., Iuvone, P. M., Pardue, M.  
406 T., & Nickerson, J. M. (2016). IRBP deficiency permits precocious ocular development and  
407 myopia. *Molecular Vision*, 22, 1291–1308.
- 408 18. Bunday, S., Crews, S. J., (1984). A study of retinitis pigmentosa in the City of Birmingham. II  
409 Clinical and genetic heterogeneity. *J MedGenet.*, 21(6): 421–428.
- 410 19. Haim, M. (2002). Epidemiology of retinitis pigmentosa in Denmark. *Acta Ophthalmol Scand*  
411 *Suppl*, 233, 1-34.
- 412 20. Hartong, D., Berson, E., & Dryja, T. (2006). Retinitis pigmentosa Prevalence and inheritance  
413 patterns. *Lancet*, 368, 1795–1809.
- 414 21. Ferrari, S., Di Iorio, E., Barbaro, V., Ponzin, D., Sorrentino, F. S., Parmeggiani, F. (2011).  
415 Retinitis Pigmentosa: Genes and Disease Mechanisms. *Current Genomics*, 12, 238-249.
- 416 22. Daiger, S.P., Sullivan, L.S., Bowne, S.J. (2013). Genes and mutations causing retinitis  
417 pigmentosa. *Clin Genet.*, 84(2).
- 418 23. Sun, H., Tsunenari, T., Yau, K. W., & Nathans, J. (2002). The vitelliform macular dystrophy  
419 protein defines a new family of chloride channels. *Proceedings of the National Academy of*  
420 *Sciences of the United States of America*, 99(6), 4008–4013.
- 421 24. Querques, G., & Souied, E. H. (2016). Macular dystrophies. *Macular Dystrophies*, 1–120.
- 422 25. Hollyfield, J. G. (1999). Hyaluronan and the functional organization of the interphotoreceptor  
423 matrix. *Investigative Ophthalmology and Visual Science*, 40(12), 2767–2769.
- 424 26. Foletta, V. C., Nishiyama, K., Rayborn, M. E., Shadrach, K. G., Young, W. S., & Hollyfield, J.  
425 G. (2001). SPACRCAN in the developing retina and pineal gland of the rat: Spatial and  
426 temporal pattern of gene expression and protein synthesis. *Journal of Comparative*  
427 *Neurology*, 435(3), 354–363.
- 428 27. Salido, E. M., & Ramamurthy, V. (2020). Proteoglycan IMPG2 shapes the interphotoreceptor  
429 matrix and modulates vision. *Journal of Neuroscience*, 40(20), 4059–4072.

- 430 28. Xu, H., Qu, C., Gan, L., Sun, K., Tan, J., Liu, X., Jiang, Z., Tian, W., Liu, W., Zhang, S., Yang,  
431 Y., Jiang, L., Zhu, X., & Zhang, L. (2020). Deletion of the *Impg2* gene causes the  
432 degeneration of rod and cone cells in mice. *Human Molecular Genetics*, 29(10), 1624–1634.
- 433 29. Avanesov, A., & Malicki, J. (2010). Analysis of the retina in the zebrafish model. In *Methods*  
434 *in Cell Biology* (Third Edition, Vol. 100, Issue C). Elsevier Inc.
- 435 30. Chhetri, J., Jacobson, G., & Gueven, N. (2014). Zebrafish-on the move towards  
436 ophthalmological research. *Eye (Basingstoke)*, 28(4), 367–380.
- 437 31. Gestri G., Link B.A., Neuhauss S.C. (2012). The visual system of zebrafish and its use to  
438 model human ocular diseases. *Dev. Neurobiol* 72(3): 302-27.
- 439 32. Glasauer, S. M. K., & Neuhauss, S. C. F. (2014). Whole-genome duplication in teleost fishes  
440 and its evolutionary consequences. *Molecular Genetics and Genomics*, 289(6), 1045–1060.
- 441 33. Yang, J., & Zhang, Y. (2015). I-TASSER server: New development for protein structure and  
442 function predictions. *Nucleic Acids Research*, 43(W1), W174–W181.
- 443 34. El-Gebali, S., Mistry, J., Bateman, A., Eddy, S. R., Luciani, A., Potter, S. C., Qureshi, M.,  
444 Richardson, L. J., Salazar, G. A., Smart, A., Sonnhammer, E. L. L., Hirsh, L., Paladin, L.,  
445 Piovesan, D., Tosatto, S. C. E., & Finn, R. D. (2019). The Pfam protein families database in  
446 2019. *Nucleic Acids Research*, 47(D1), D427–D432.
- 447 35. Gasteiger, E., Gattiker, A., Hoogland, C., Ivanyi, I., Appel, R. D., & Bairoch, A. (2003).  
448 ExpASY: The proteomics server for in-depth protein knowledge and analysis. *Nucleic Acids*  
449 *Research*, 31(13), 3784–3788.
- 450 36. Acharya, S., Foletta, V. C., Lee, J. W., Rayborn, M. E., Rodriguez, I. R., Young, W. S., &  
451 Hollyfield, J. G. (2000). SPACRCAN, a novel human interphotoreceptor matrix hyaluronan-  
452 binding proteoglycan synthesized by photoreceptors and pinealocytes. *Journal of Biological*  
453 *Chemistry*, 275(10), 6945–6955.
- 454 37. Xu, H., Li, C., Zeng, Q., Agrawal, I., Zhu, X., Gong, Z. (2016). Genome-wide identification of  
455 suitable zebrafish *Danio rerio* reference genes for normalization of gene expression data by  
456 RT-qPCR, *J Fish Biol.*, 88(6):2095-110.

- 457 38. Huber, T., & Sakmar, T. P. (2008). Rhodopsin's active state is frozen like a DEER in the  
458 headlights. *Proceedings of the National Academy of Sciences of the United States of*  
459 *America*, 105(21), 7343–7344.
- 460 39. Rakshit, T., & Park, P. S. H. (2015). Impact of reduced rhodopsin expression on the structure  
461 of rod outer segment disc membranes. *Biochemistry*, 54(18), 2885–2894.
- 462 40. Reinhard, J., Joachim, S. C. & Faissner, A. (2015). Extracellular matrix remodeling during  
463 retinal development. *Exp Eye Res* 133, 132–140.
- 464 41. Nichol, K. A., Schulz, M. W. & Bennett, M. R. (1995) Nitric oxide-mediated death of cultured  
465 neonatal retinal ganglion cells: neuroprotective properties of glutamate and chondroitin  
466 sulfate proteoglycan. *Brain Res* 697, 1–16.
- 467 42. Reinhard, J., Renner, M., Wiemann, S., Shakoor, D. A., Stute, G., Dick, H. B., Faissner, A.,  
468 & Joachim, S. C. (2017). Ischemic injury leads to extracellular matrix alterations in retina and  
469 optic nerve. *Scientific Reports*, 7, 1–17.
- 470 43. Eksandh, L. C., Ponjavic, V., Ayyagari, R., Bingham, E. L., Hiriyan, K. T., Andréasson, S.,  
471 Ehinger, B., & Sieving, P. A. (2000). Phenotypic expression of juvenile x-linked retinoschisis  
472 in swedish families with different mutations in the xlr1 gene. *Archives of Ophthalmology*,  
473 118(8), 1098–1104.
- 474 44. Westerfield, M. (2000). *The Zebrafish Book. A Guide for the Laboratory Use of Zebrafish*  
475 *(Danio rerio)*, 4th Edition. University of Oregon Press, Eugene.

476

## 477 **Supporting Information**

478 **S1 Table. Primers used for RT-qPCR experiments.**

479

480 **S2 Table. Antibodies used for Western blot (WB) and immunohistochemistry (IHC)**  
481 **experiments.**

482

483 **S3 Table. Primers used for Digoxigenin-labelled RNA probe synthesis.**

A

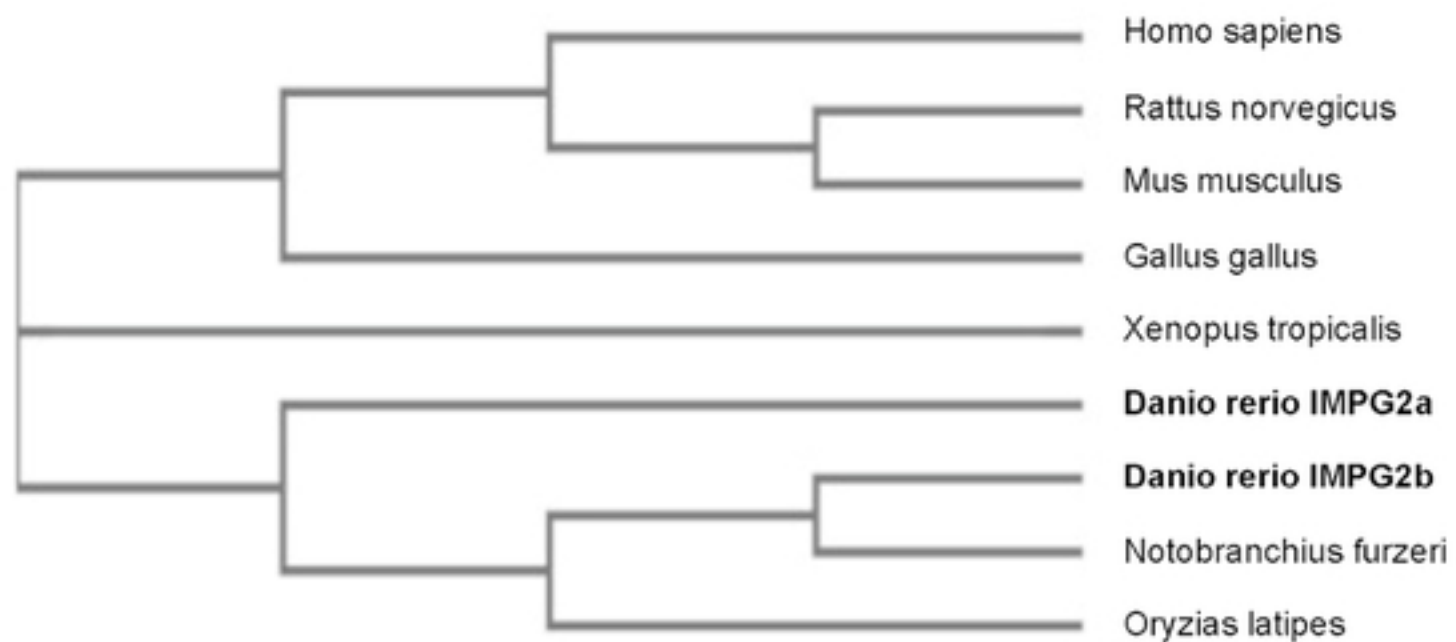

B

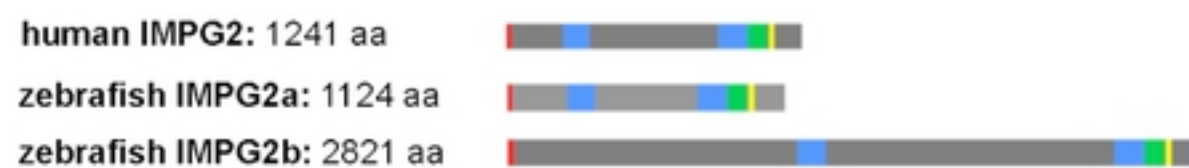

A

|              | Overlapping Sequences | Identities | Positives | Gaps |
|--------------|-----------------------|------------|-----------|------|
| SEA1 IMPG2   | 240 - 351             | 34%        | 50%       | 5%   |
| SEA1 IMPG2a  | 244 - 358             |            |           |      |
| SEA2 IMPG2   | 898 - 1012            | 85%        | 91%       | 0%   |
| SEA2 IMPG2a  | 775 - 889             |            |           |      |
| EGF-r IMPG2  | 1012 - 1098           | 79%        | 89%       | 0%   |
| EGF-r IMPG2a | 889 - 975             |            |           |      |
| SEA1 IMPG2   | 239 - 353             | 46%        | 64%       | 4%   |
| SEA1 IMPG2b  | 1180 - 1297           |            |           |      |
| SEA2 IMPG2   | 898 - 1012            | 85%        | 90%       | 0%   |
| SEA2 IMPG2b  | 2473 - 2587           |            |           |      |
| EGF-r IMPG2  | 1012 - 1098           | 79%        | 89%       | 0%   |
| EGF-r IMPG2b | 2587 - 2673           |            |           |      |

bioRxiv preprint doi: <https://doi.org/10.1101/2021.03.09.434550>; this version posted March 9, 2021. The copyright holder for this preprint (which was not certified by peer review) is the author/funder, who has granted bioRxiv a license to display the preprint in perpetuity. It is made available under aCC-BY 4.0 International license.

B

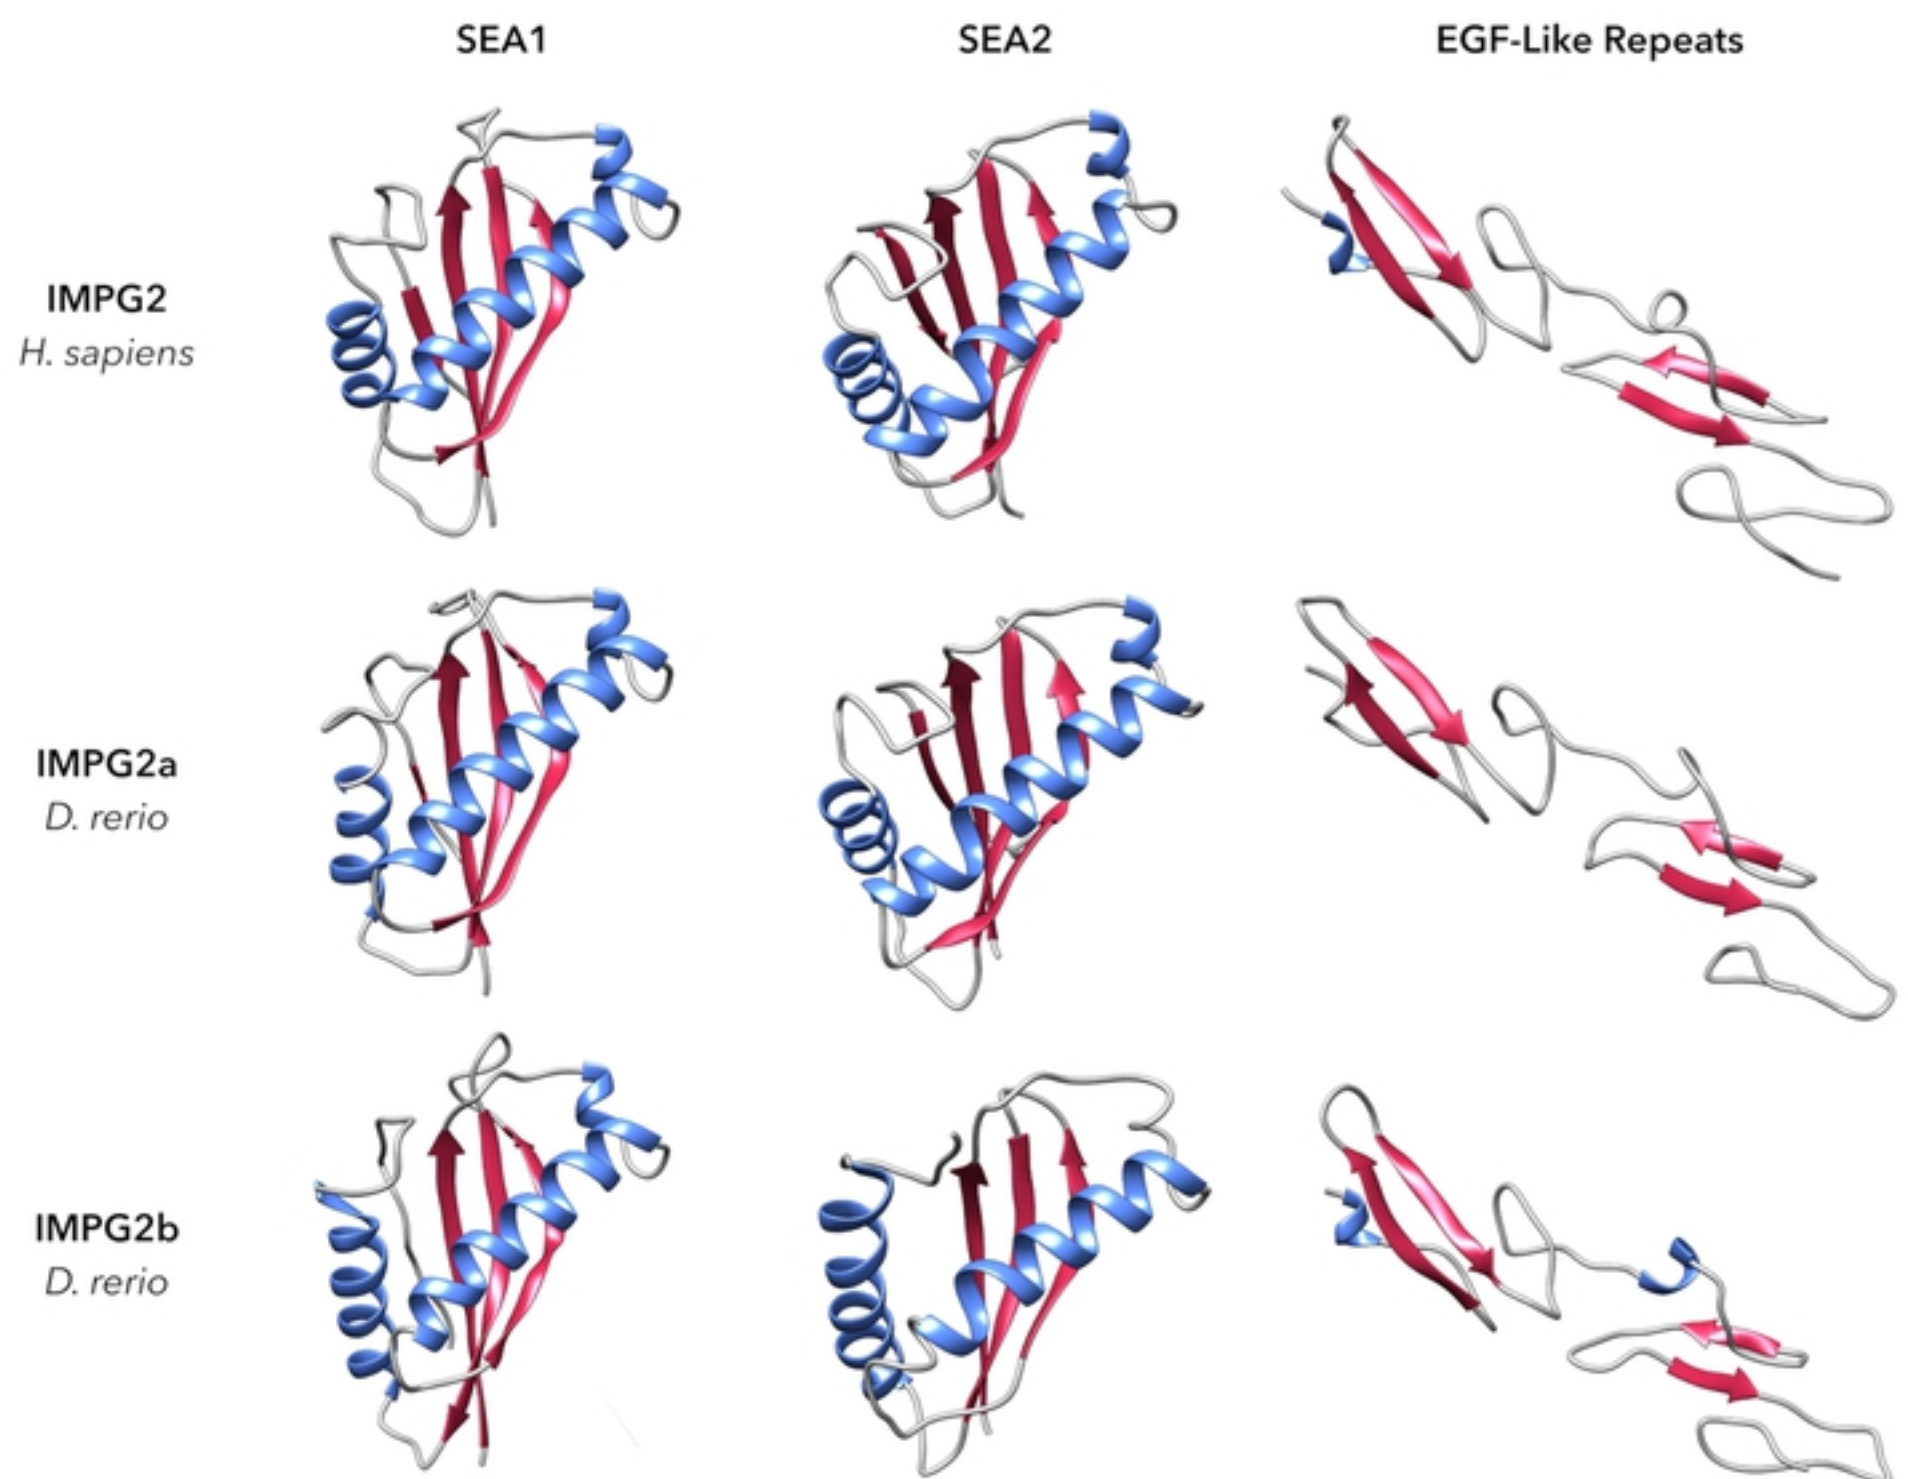

Figure 2



A

bioRxiv preprint doi: <https://doi.org/10.1101/2021.03.09.434550>; this version posted March 9, 2021. The copyright holder for this preprint (which was not certified by peer review) is the author/funder, who has granted bioRxiv a license to display the preprint in perpetuity. It is made available under aCC-BY 4.0 International license.

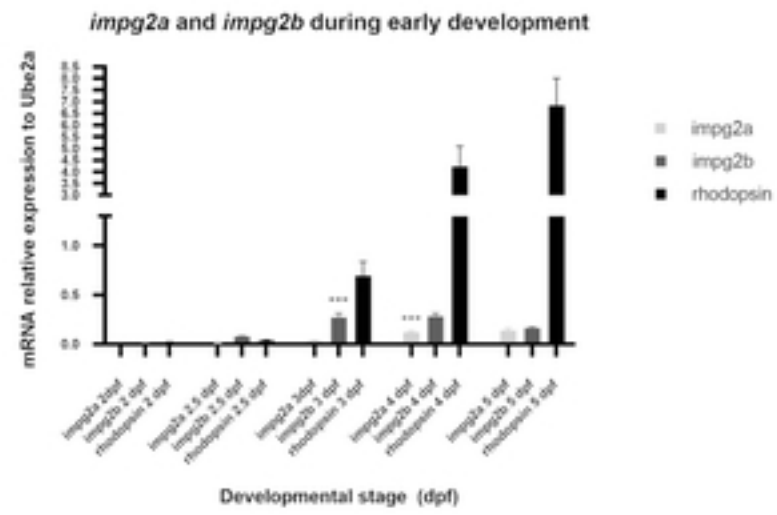

B

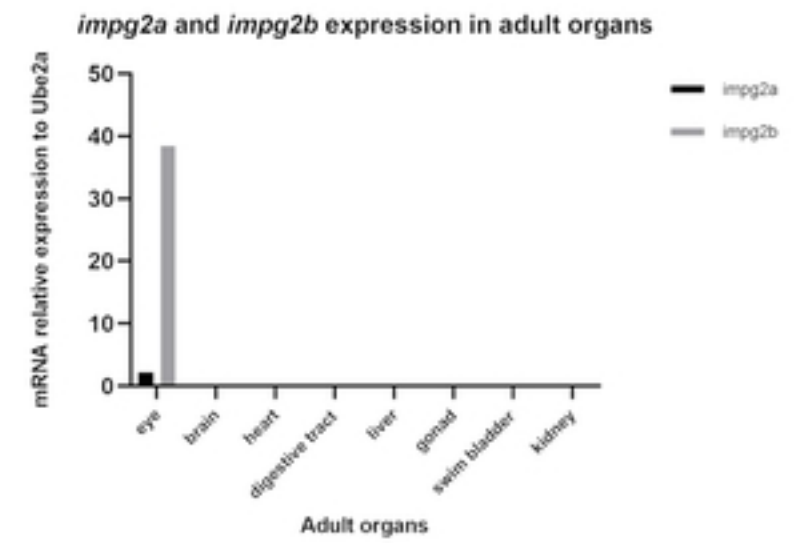

C

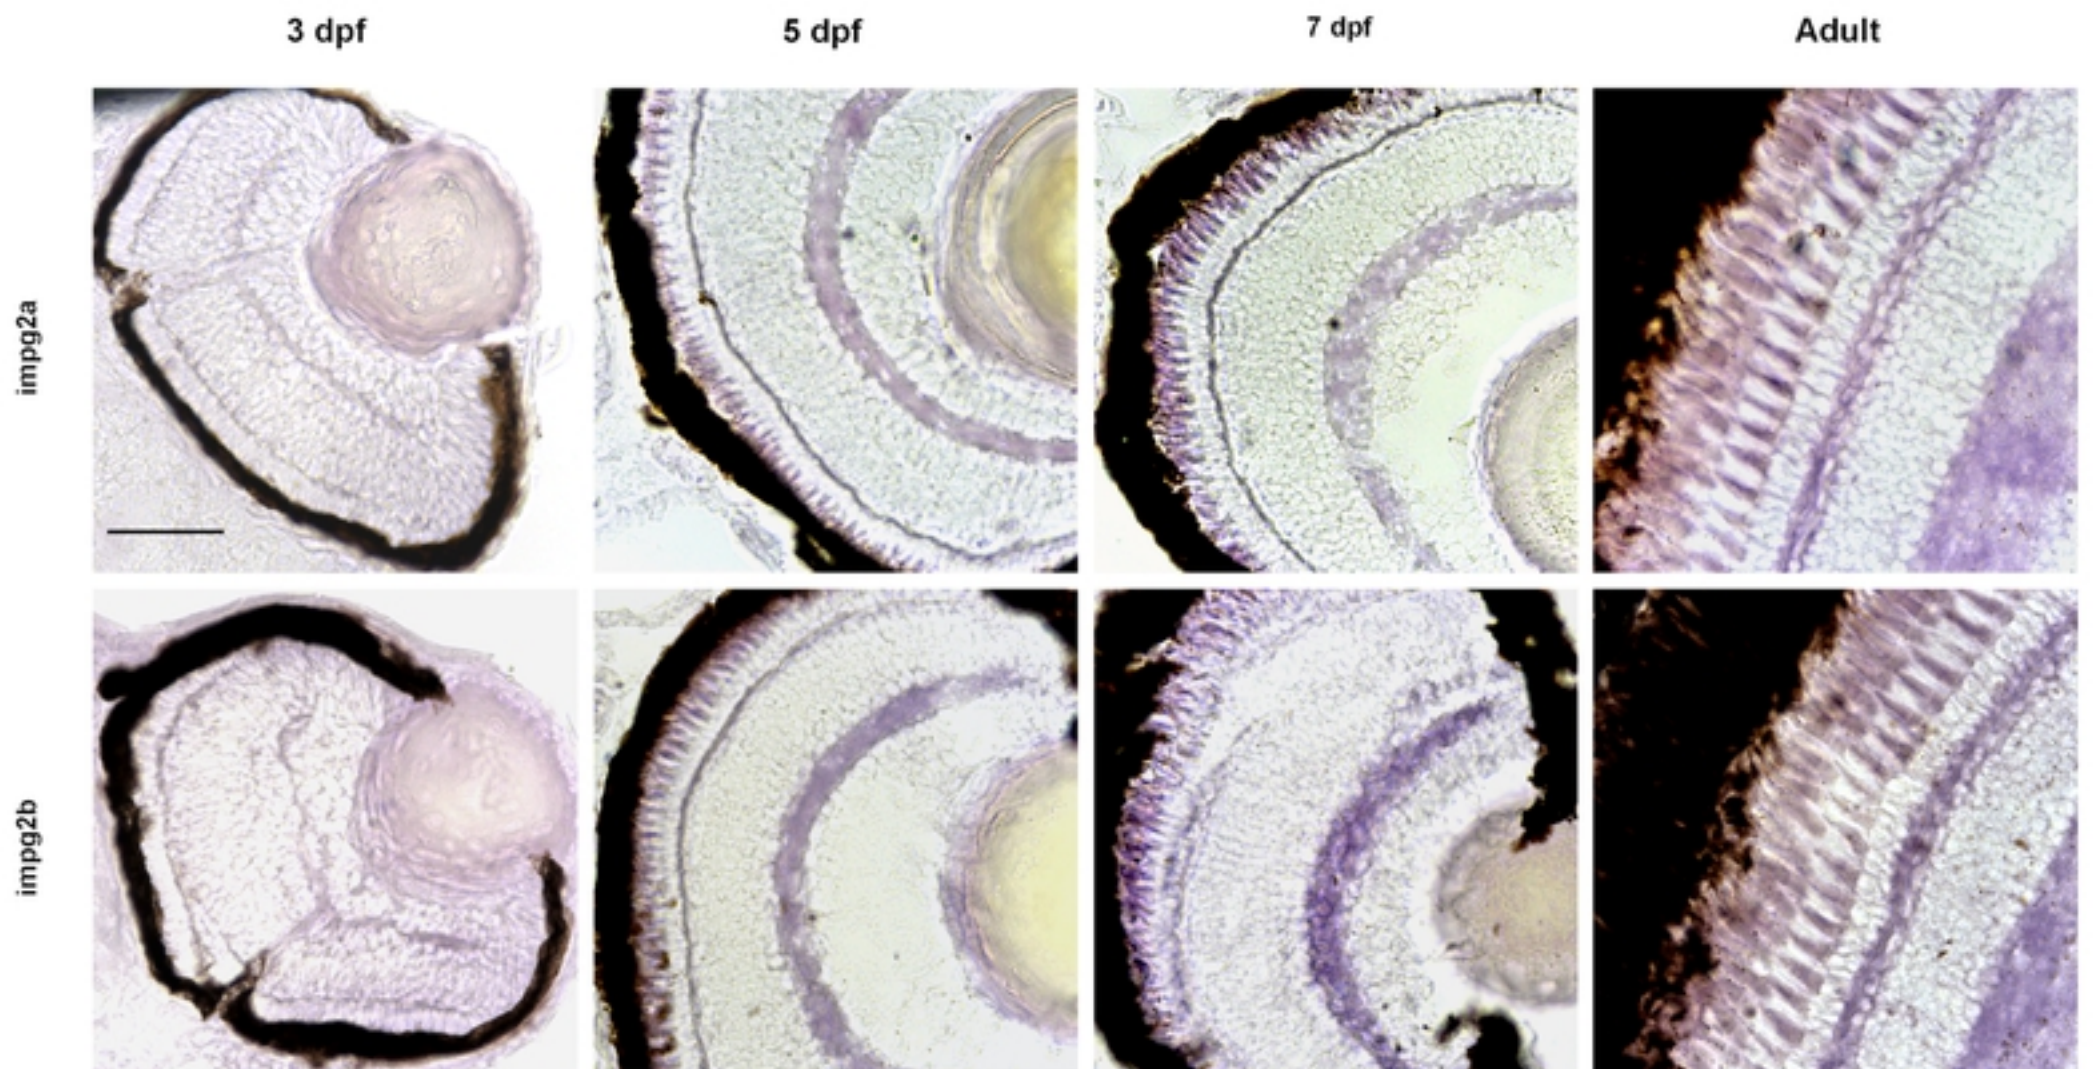

Figure 3

A

bioRxiv preprint doi: <https://doi.org/10.1101/2021.03.09.434550>; this version posted March 9, 2021. The copyright holder for this preprint (which was not certified by peer review) is the author/funder, who has granted bioRxiv a license to display the preprint in perpetuity. It is made available under aCC-BY 4.0 International license.

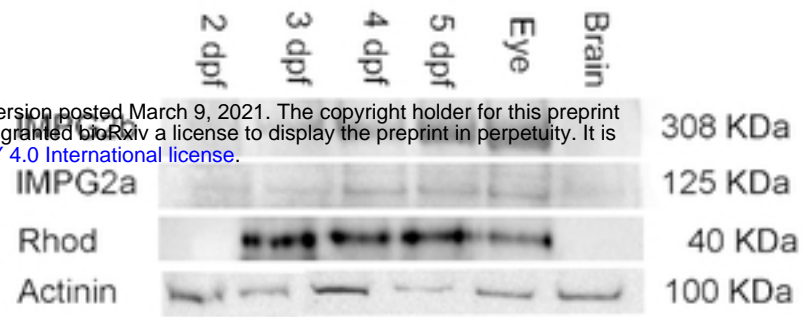

B

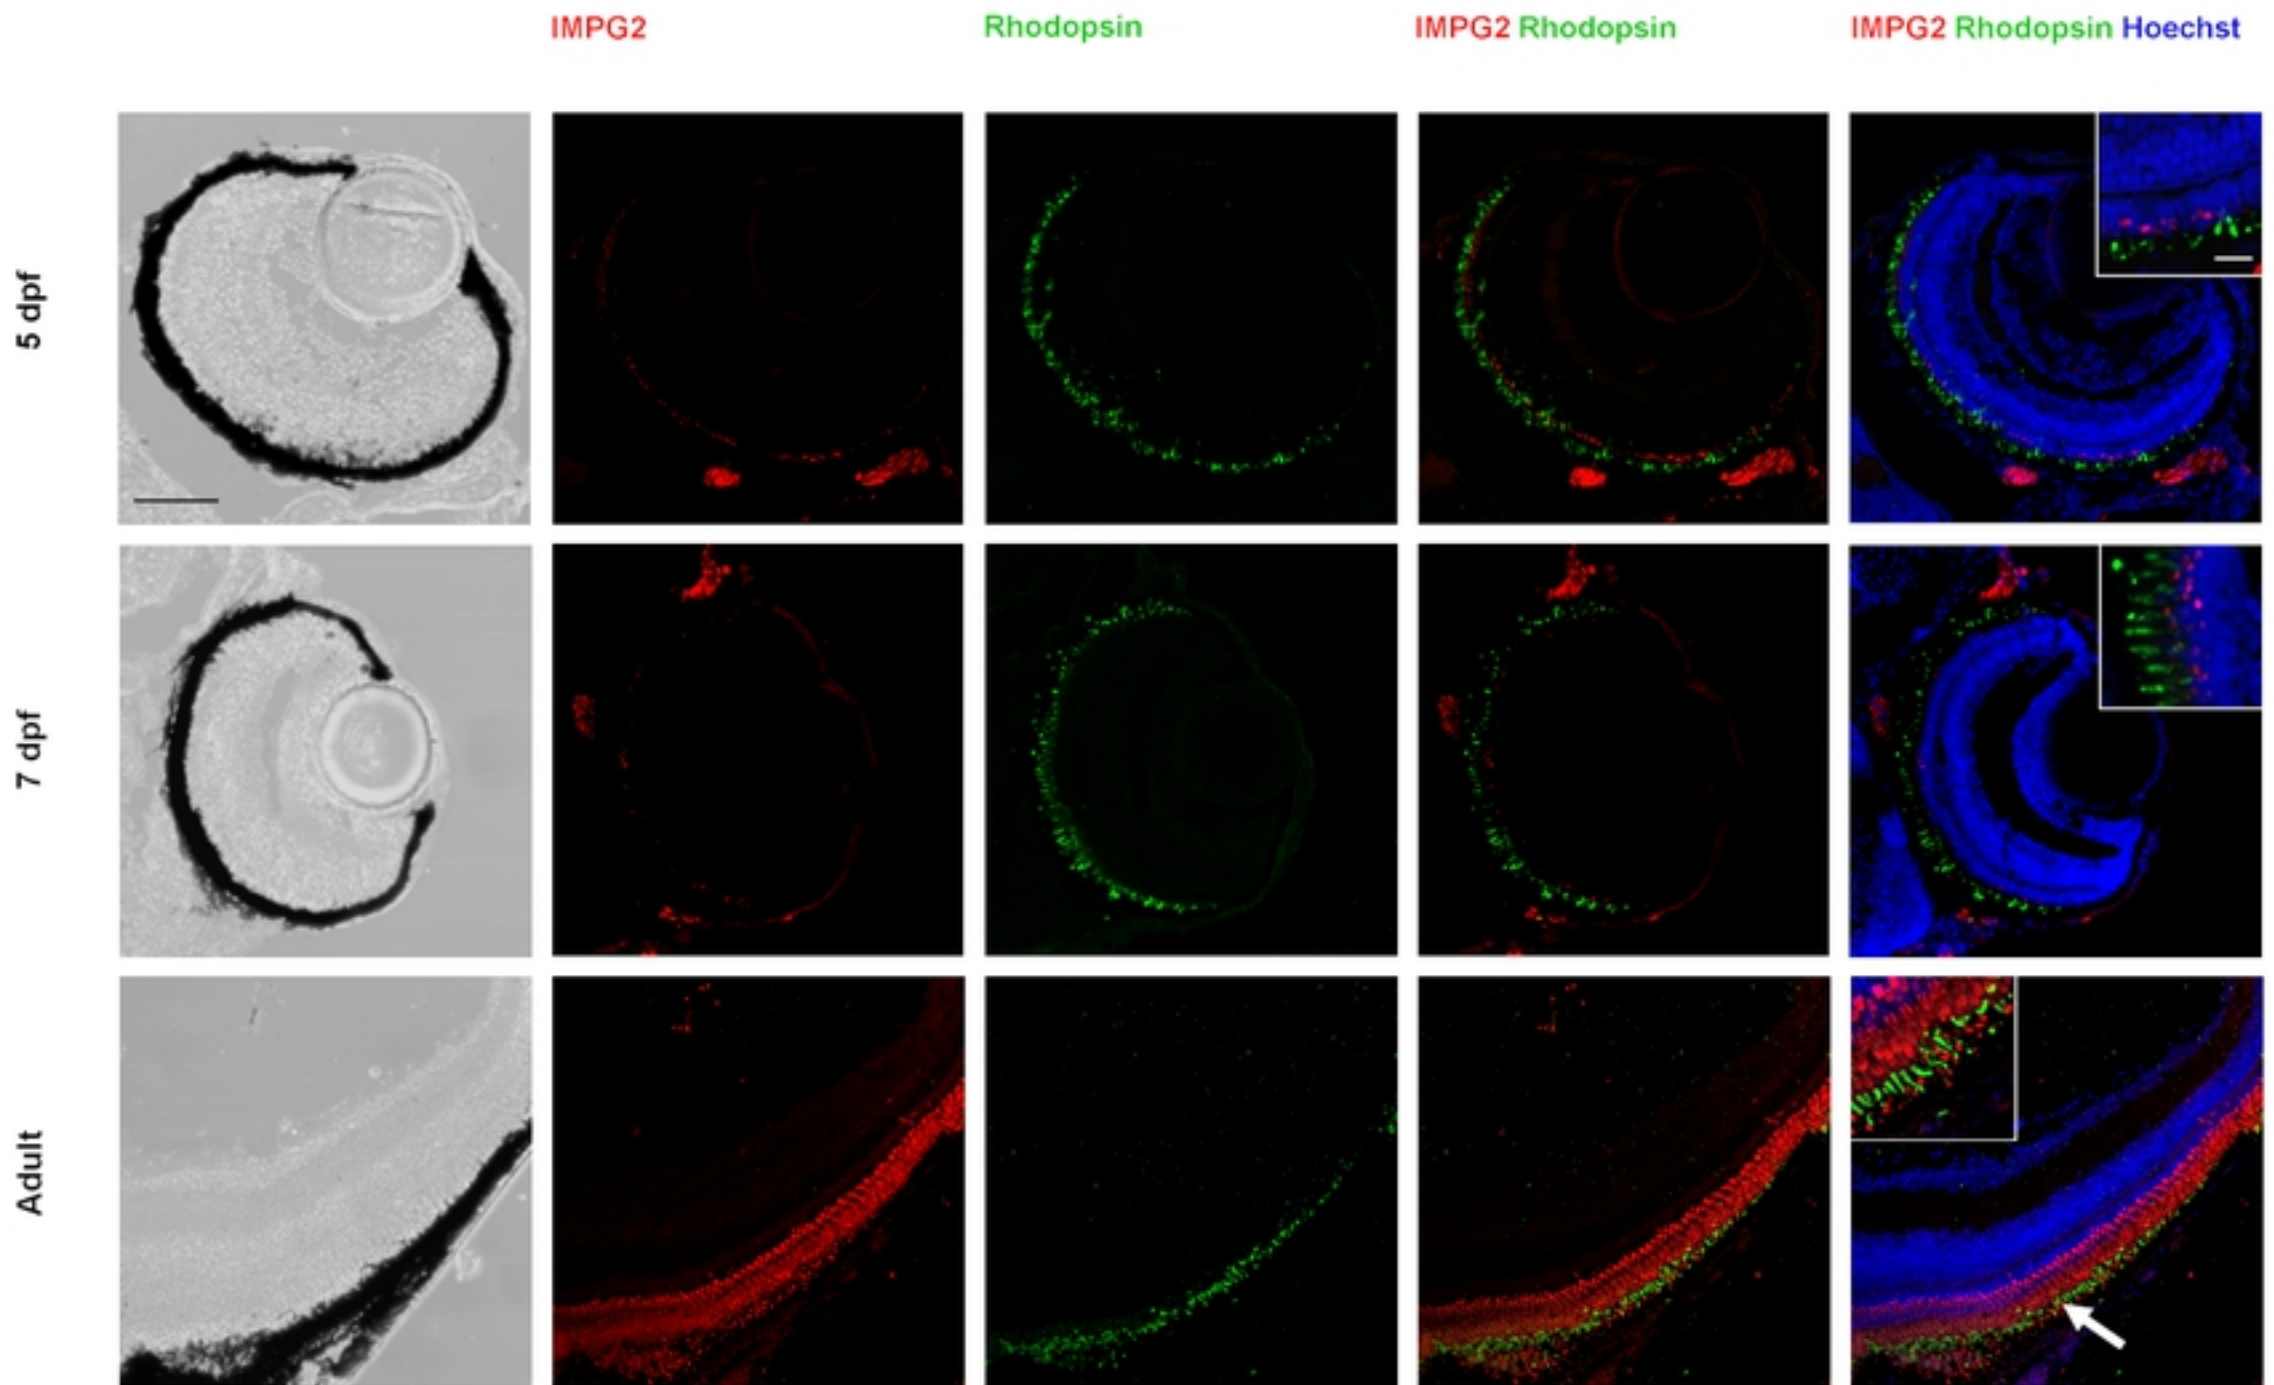

Figure 4
